# Supplementary material for: The Human Aspect of Horse Care: How the COVID-19 Pandemic Impacted the Wellbeing of Equestrian Industry Stakeholders
Source: MDPI journal article supplement (doi:10.3390/ani11082163), 2021-07-22
Supplement: s1 [file s1]

Supplementary file 1. Table S1.

| Theme                              | Sub-theme        | Condensed meaning unit                | Wellbeing impact                                                |
|------------------------------------|------------------|---------------------------------------|-----------------------------------------------------------------|
| The ways the industry communicates | Teleconsultation | Positive for clients                  | Fulfilling domain specific satisfaction                         |
|                                    |                  | Better vet-client relationships       | Stimulating work activity                                       |
|                                    |                  | Increased workload - no increased pay | Affecting work-life balance / increasing stress at work         |
|                                    |                  | Bullying behaviours                   | Affects self-esteem / confidence / increase frustration.        |
|                                    |                  | Too many calls in one day             | Affecting work-life balance / increasing stress at work         |
|                                    |                  | Juggling admin with calls             | Affecting work-life balance / increasing stress at work         |
|                                    |                  | Hard to judge condition               | Non-stimulating / frustrating work activity / stress            |
|                                    |                  | Organisations benefit more than vets  | Resentment for organisation / stress                            |
|                                    |                  | Vets made decision to switch          | Resentment for organisation / stress                            |
|                                    | Digital training | Chance to keep up with training       | Pursue hobby / sport, skill development                         |
|                                    |                  | Maintain horse fitness                | Animal healthy, owner satisfied, domain satisfaction            |
|                                    |                  | Engage in routine                     | Maintain daily routine, familiarity, comfort, life satisfaction |
|                                    |                  | Spend time outdoors                   | Relaxation and enjoyment, life satisfaction                     |
|                                    |                  | Interact with friends                 | Social wellbeing                                                |
|                                    |                  | Enter competition                     | Pursue hobby / sport, goal setting                              |

|                             |                          |                                                      |                                                                        |
|-----------------------------|--------------------------|------------------------------------------------------|------------------------------------------------------------------------|
|                             |                          | Engage in CPD                                        | Fulfilling domain specific satisfaction                                |
|                             | Social media             | Communicated to broad audience                       | Good for wider community, work activity                                |
|                             |                          | Interact with others online                          | Social wellbeing                                                       |
|                             |                          | Share experiences                                    | Fulfilment from interaction / feedback from peers, social wellbeing    |
|                             |                          | Rapidly share important information                  | Good for wider community, work satisfaction                            |
|                             |                          | Makes others jealous                                 | Negative for peer-peer relationships                                   |
|                             |                          | Aggravates others                                    | Negative for peer-peer relationships                                   |
|                             |                          | Possibility to receive judgement from others         | Negative for peer-peer relationships, negative for mental health       |
| Reduced contact with horses | Closing yards            | Lack of interaction with horse                       | Loneliness, lack of positive animal feedback                           |
|                             |                          | Change in routine                                    | Psychological impact of unfamiliar routine                             |
|                             |                          | Loss of social circle                                | Loneliness, lack of positive human feedback                            |
|                             |                          | Missing horse-riding activity / sport                | Loneliness, lack of positive human feedback, reduced physical activity |
|                             | Fearing for horse health | Will horse be shod                                   | Psychological impact animal perceived as being vulnerable              |
|                             |                          | Worried around vaccinations                          | Psychological impact animal perceived as being vulnerable              |
|                             |                          | Worries around tooth rasping                         | Psychological impact animal perceived as being vulnerable              |
|                             |                          | Worried around weight gain                           | Psychological impact animal perceived as being vulnerable              |
|                             |                          | Worried for health / colic if they are fed by public | Psychological impact animal perceived as being vulnerable              |
|                             |                          |                                                      |                                                                        |

|                     |                                   |                                                                |                                                               |
|---------------------|-----------------------------------|----------------------------------------------------------------|---------------------------------------------------------------|
|                     | Lacking positive interactions     | Physical interaction with horse helps day-to-day stress        | Human -animal bond strong & perceived as necessary to cope    |
|                     |                                   | Need horse time to decompress                                  | Human -animal bond strong & perceived as necessary to cope    |
|                     |                                   | Spending time with animals helps relieve worry                 | Human -animal bond strong & perceived as necessary to cope    |
| Prosocial behaviour | Virtual socialising /fund raising | Zoom calls to raise money for BHS                              | Altruism positive for community, emotional wellbeing improved |
|                     |                                   | Quiz to interact with others                                   | Strong social bonds form in yard environment                  |
|                     |                                   | Maintain relationship with yard groups                         | Strong social bonds form in yard environment                  |
|                     | Supporting community              | Farrier shoeing horses for free                                | Community values                                              |
|                     |                                   | Farriers refusing to "steal" clients                           | Community values                                              |
|                     |                                   | Creating content for owners to feel "part of something"        | Understanding of yard social groups                           |
|                     |                                   | Developing novel ways for owners to interact with their horses | Understanding of the importance of human-horse interaction    |
|                     |                                   | Providing social support group for owners.                     | Strong social bonds form in yard environment                  |
|                     | Valuing time with horses          | Little things feel more important now                          | Importance of practical horse care tasks in mental wellbeing  |
|                     |                                   | People with horses fared better than those without             | Fortunate position                                            |
|                     |                                   | Important to take stock of the journey with horses             | Importance of practical horse care tasks in mental wellbeing  |
|                     |                                   | Grooming, walking, caring for horses of higher value now       | Importance of practical horse care tasks in mental wellbeing  |

Table S1 shows a summary of themes, subthemes and the summarised meaning units interpreted from the interview transcripts, as well as the specific wellbeing associated impact relating to the subject raised in the meaning unit.
